# Supplementary material for: Evaluation of A Newly Designed Patient-Friendly Discharge Letter – A Randomized, Controlled Participant-Blind Trial
Source: Research Square preprint supplement (doi:10.21203/rs.3.rs-114183/v1), 2020-12-07
Supplement: Supplementary file 2 [file 5d5807206d8ae328ddf78248.xlsx]

## Sheet: discharge_letter_survey
	Evaluation of a Newly Designed Patient-Friendly Discharge Letter – A Randomized, Controlled Participant-Blind Trial
	Christian Smolle1,2, Christine Maria Schwarz2, Magdalena Hoffmann2,3, Lars-Peter Kamolz1,2, Gerald Sendlhofer2,3,#, Gernot Brunner1
	1 Division of Plastic, Aesthetic and Reconstructive Surgery, Department of Surgery, Medical University of Graz, Auenbruggerplatz 29/4, 8036 Graz, Austria
	2 Research Unit Safety in Health, Division of Plastic, Aesthetic and Reconstructive Surgery, Department of Surgery, Medical University of Graz, Auenbruggerplatz 29/4, 8036 Graz, Austria
	3 Division of Endocrinology and Diabetology, Department of Internal Medicine, Medical University of Graz, Auenbruggerplatz 15, 8036 Graz, Austria
	# Corresponding author: Gerald Sendlhofer, PD Mag. Dr., Division of Plastic, Aesthetic and Reconstructive Surgery, Department of Surgery, Medical University of Graz, Auenbruggerplatz 29/4, 8036 Graz, Austria, Email: gerald.sendlhofer@medunigraz.at, Telephone: +43 316 385 14685
Letter	CDL(1)_PFDL(2)	ID	1.1 Gender (1=female, 2=male)	1.2 Age	1.3 What study semester are you in:	2.1 Is the layout clear?	2.2 Is the structure comprehensible?	2.3 Does the content justify the length of the document?	3.1 Are the used abbreviations clear?	3.2 Are abbreviations explained?	3.3 Is the referral letter phrased in a comprehensible way?	3.4 Is the chronological sequence of events during hospital stay presented in a conclusive manner?	3.5 Are main and secondary diagnoses clearly evident?	3.6 Are the reasons for the therapeutic approach during hospital stay comprehensible?	3.7 Are therapy recommendations and goals of rehabilitation clear?	3.8 Are the therapeutic steps taken described in detail and comprehensible?	3.9 Is the recommended medication described in detail, including trade name, active agent, dosage and route of description?	3.10 Is there information concerning possible allergies?	3.11 Is contact information of a doctor provided for possible queries?	4.1 Would a medical layperson be able to understand the content of the referral letter?	4.2 Would the indication of the prescribed medication be comprehensible for a medical layperson?	4.3 Would a medical layperson be able to deduce necessary further diagnostic or therapeutic measures from the referral letter?	4.4 (Open answer)	Surgical letter (1), Internal letter (2)	Overall_median	Section2_median	Section3_median	Section4_median
1	1	1	2	23	1	2	2	2	1	6	2	3	1	1	2	2	1	6		6	6	3		1	2	2	2	6
1	1	2	2	22	1	2	2	3	5	6	2	2	1	2	2	5	4	6	1	6	6	3		1	3	2	2	6
1	1	3	1	26	1	3	2	4	5	5	2	5	4	5	5	4	5	5	5	6	6	6		1	5	3	5	6
1	1	4	1	22	1	3	2	3	5	6	3	1	1	3	2	3	2	5	2	6	3	3		1	3	3	3	3
1	1	5	2	23	1	6	1	2	1	4	1	1	1	1	2	2	1	6	1	6	4	4		1	2	2	1	4
1	1	6	1	22	1	2	2	3	4	6	3	2	2	3	2	3	2	6	1	6	6	3	generell zu vile Fremdwörter nzw. medizinische Begriffe wie Abkürzungen -> für einen Laien nicht verständlich.	1	3	2	3	6
1	1	7	2	23	1	2	1	2	1	6	5	2	1	2	1	5	2	6	2	5	1	1		1	2	2	2	1
1	1	8	1	22	1	1	1	1	2	2	1	1	1	3	1	1	1	6	3	3	1	2		1	1	1	1	2
1	1	9	1	21	1	3	5	2	1	6	2	2	1	1	1	2	1	6	1	6	6	2		1	2	3	1	6
1	1	10	2	24	1	3	2	1	2	6	3	3	1	5	2	3	1	6	6	5	6	5		1	3	2	3	5
1	1	11	2	20	1	2	2	3	2	5	2	1	1	4	2	1	1	6	2	6	5	5		1	2	2	2	5
1	1	12	1	21	1	2	2	1	1	5	2	5	1	3	5	4	6	5	4	6	6	6		1	4	2	4	6
1	1	13	2	26	1	6	6	6	6	6	6	3	4	2	1	1	1	6	5	6	6	1		1	6	6	4	6
1	1	14	1	22	1	2	2	3	3	5	3	4	1	2	1	1	1	5	4	5	5	4		1	3	2	3	5
1	1	15	2	23	1	2	2	2	3	3	1	2	1	2	1	2	1	6	3	3	5	2		1	2	2	2	3
1	1	16	1	22	1	3	3	1	1	6	1	4	1	1	1	2	6	6	3	6	6	3		1	3	3	2	6
1	1	17	1	21	1	1	3	1	3	6	3	3	1	3	6	5	6	6	2	6	6	6		1	3	1	3	6
1	1	18	1		1	1	1	1	1	6	2	6	1	1	6	1	6	6	1	6	6	6		1	2	1	2	6
1	1	19	2	26	1	1	2	2	3	6	2	1	1	3	1	2	2	5	5	4	5	3		1	2	2	2	4
1	1	20	2	22	1	2	2	1	2	6	2	3	1	2	4	3	1	6	1	5	6	4		1	2	2	2	5
1	1	21	2	23	1	1	2	2	2	3	2	2	1	1	3	2	1	4	2	5	4	3		1	2	2	2	4
2	2	22	2	23	1	1	1	1	1	1	1	1	1	2	1	1	1	1	1	1	1	1	Durch Informationen in Klammern in "nicht Medizinischer" Sprache sehr gut für Patienten verständlich.	1	1	1	1	1
2	2	23	1	21	1	1	2	1	2	1	1	2	1		1	2	1	1	3	2	1	2		1	1	1	1	2
2	2	24	1	21	1	2	2	1	3	2	1	3	1	2	1	2	1	1	2	2	2	1		1	2	2	2	2
2	2	25	1	23	1	1	1	2	4	3	6	3	1	3	1	2	1	1	1	6	2	2		1	2	1	2	2
2	2	26	1	22	1	1	1	3	5	4	3	2	1	3	1	5	1	1	1	5	2	2		1	2	1	2	2
2	2	27	1	22	1	1	2	2	2	3	1	4	1	2	1	2	1	1	1	2	1	1	In finde den Entlassungsbrief gut. Besonders die Tabelle zu dem Medikamenten ist sehr hilfreich und wurde von mir in dieser Art noch nie gesehen.	1	1	2	1	1
2	2	28	1	24	2	1	1	1	1	1	1	1	1	1	1	1	1	1	1	1	1	2	Der Entlassungsbrief ist meiner Meinung nach sehr gut zu verstehen. Es wurde alles ausführlich und verständlich erklärt. Gliederung war auch strukturiert.	1	1	1	1	1
2	2	29	1	22	1	1	1	2	1	1	1	1	1	1	1	1	1	1	2	2	2	2	Gute Gliederung uns sehr positiv ist, dass am Ende der Absatzes immer kurz für den Laien verständlich alles erklärt wird. Sehr positiv auch die Zusätze zur Medikation	1	1	1	1	2
2	2	30	1	21	1	1	1	1	2	1	1	3	1	1	1	1	1	1	1	2	1	1	Die Erklärung der Lad.medizin. Begriffe sind sehr hilfreich. Sehr guter Lösungsansatz!!!	1	1	1	1	1
2	2	31	2	22	1	3	2	2	5	6	6	2	2	3	3	2	4	6	1	4	3	1		1	3	2	3	3
2	2	32	2	24	1	1	1	1	2	2	1	1	1	1	1	1	1	1	1	6	1	2		1	1	1	1	2
2	2	33	1	23	1	1	1	1	3	4	2	1	1	1	1	1	1	1	2	2	1	1		1	1	1	1	1
2	2	34	1	22	1	1	1	3	2	1	1	1	1	1	1	1	1	1	1	2	1	1	Im Alltag bleibt wenig Zeit für solch ausführliche Arztbriefe!	1	1	1	1	1
2	2	35	2	22	1	1	1	1	3	2	1	2	1	1	1	1	1	1	6	2	1	2		1	1	1	1	2
2	2	36	1	22	1		3	4	5	6	3	2	1	2	1	2	1	1	1	4	1	3		1	2	3.5	2	3
2	2	37	2	22	1	2	2	1	5	4	4	4	2	3	2	3	1	1	2	4	2	2		1	2	2	3	2
2	2	38	1	23	3	2	3	1	6	6	2	3	5	3	1	1	1	1	1	5	3	3		1	3	2	2	3
3	1	39	2	22	1	2	1	6	3	6	1	4	1	1	4	2	1	6	6	6	6	6		2	4	2	3	6
3	1	40	1	51	1	2	2	2	6	6	6	2	6	6	5	6	6	6	6	6	6	5	Beantwortet in dem Verständnis, dass der Inhalt des Entlassungsbrief für den Patienten und nicht für den Hausarzt verständlich ist.	2	6	2	6	6
3	1	41	1	22	1	1	1	2	2	6	2	4	1	5	5	5	4	6	1	6	6	5	Ich denke im allgemeinen wäre es viel leichter weinn keine Abkürzungen verwendet werden würden, da diese z.T unverständlich sind und zu Verwechslungen führen können. Ein erfundenes Beispiel wäre HWI= 1= Harnwegsinfekt 2=Hinterwansinfarkt	2	4	1	4	6
3	1	42	1	22	1	2	2	3	3	6	1	2	3	3	1	2	3	6	2	5	5	4	Der Entlassungsbrief ist nur für einen Arzt verständlich Formuliert für den Laien hingegen unzureichend erklärt.	2	3	2	3	5
3	1	43	1	21	1	1	2	3	5	6	3	3	1	4	5	4	3	2	2	6	6	3		2	3	2	3	6
3	1	44	2	24	1	2	2	3	5	6	3	4	1	3	3	4	2	5	4	5	6	5		2	4	2	4	5
3	1	45	1	23	1	1	1	1	3	6	1	1	1	1	1	1	1	5	1	3	3	1	Die Medikamente nimmt der Patient, schon länger, d.h der Hausarzt wir d ihm wohl erklärt worden. Meiner Meinung nach wär es unnötig und zu viel, alles in einem Entlassungsbrief genauesten zu erklären	2	1	1	1	3
3	1	46	2	23	1	1	1	3	5	6	3	2	2	2	5	3	2	6		6	6	5	Das Hauptproblem ist meiner Meinung nach das "NSAR" sollte vermieden werden. Ein Laie weiß sicher nicht was das ist und jeder hat zuhause irgendein, "over the Counter" Medikament (NSAR- Medikament) außerdem glaub ich das der viele Text mir Fachwörtern eher zu Unruhe des Patienten beiträgt.	2	3	1	3	6
3	1	47	2	22	1	2	1	2	3	6	2	1	5	2	2	1	3	6	6	6	6	4		2	3	2	3	6
3	1	48	2	21	1	1	1	1	3	3	1	1	1	1	1	1	1	6	1	6	6	4		2	1	1	1	6
3	1	49	1	27	1	1	1	1	4	6	2	1	3	2	3	3	4	6	4	6	6	6	Buchstabensalat!	2	3	1	3	6
3	1	50	1	21	1	3	2	2	4	6	5	3	1	1	5	5	2	6	6	6	6	3		2	4	2	5	6
3	1	51	2	21	1	1	1	1	2	4	1	1	1	1	1	1	2	6	4	3	5	1		2	1	1	1	3
3	1	52	1	22	1	1	1	1	2	6	2	1	1	4	6	6	6	6	6	5	6	6	- keine Therapieempfehlung -> auch wenn (unvorstellbar) keine Medikamente notwendig wären, wäre es gut das zu vermerken! -Abkürzungen in Hauptdiagnose & weiteren Diagnosen OK -> im Text ausschreiben für Lesbarkeit und Verständlichkeit	2	5	1	6	6
3	1	53	1	21	1	3	1	2	6	6	2	3	3	2	3	3	6	6	6	6	6	6		2	3	2	3	6
3	1	54	2	21	1	1	1	2	2	5	1	1	2	1	1	2	2	6	1	5	5	2	Sehr ausführlich. Gute Übersicht	2	2	1	2	5
3	1	55	1	20	1	1	1	2	3	6	2	1	1	1	1	1	1	6	5	6	6	2		2	2	1	1	6
3	1	56	1	23	1	2	1	1	3	6	1	2	1	3	2	2	3	6	3	5	6	2		2	2	1	3	5
4	2	57	2	23	1	3	3	1	5	4	3	4	2	2	2	2	2	1	1	4	2	1	Mehr Hinweise zu den angeführten Abkürzungen ( Ergebnisse der Diagnostik => Was bedeutet die Milzvergrößerung für den Pat. zB)	2	2	3	2	2
4	2	58	1	26	1	3	3	1	2	1	1	3	1	4	4	3	2	6	1	2	3	1		2	2	3	2	2
4	2	59	1	22	1	1	1	1	1	1	1	1	1	1	1	1	1	1	2	1	1	1		2	1	1	1	1
4	2	60	2	29	1	2	1	1	2	2	1	2	1	3	3	2	1	1	4	3	1	1		2	2	1	2	1
4	2	61	1	21	1	1	1	1	1	1	1	1	1	1	1	1	1	1	1	5	2	1		2	1	1	1	2
4	2	62	1	22	1	2	3	1	2	1	2	1	1	2	1	2	1	1	1	4	2	2		2	2	2	1	2
4	2	63	1	23	1	3	2	2	2	1	2	2	1	1	1	2	1	1	1	4	4	4		2	2	2	1	4
4	2	64	1	24	1	1	1	1	1	1	1	1	1	1	1	1	1	1	1	1	1	1		2	1	1	1	1
4	2	65	1	22	1	1	1	2	5	3	2	1	2	5	3	3	1	1	1	3	3	3		2	2	1	2	3
4	2	66	1	22	1	1	1	1	2	2	1	2	1	3	6	3	1	1	1	3	1	6		2	1	1	2	3
4	2	67	2	22	1	1	1	1	2	3	1	1	2	1	2	3	4	1	1	3	4	1	Bei den Medikamenten alt noch Verweise/ Links zu weiterführenden Quellen um sich zu informieren.	2	1	1	2	3
4	2	68	2	23	1	1	1	1	1	1	1	1	1	1	1	1	1	1	1	2	1	1		2	1	1	1	1
4	2	69	2	21	1	2	2	1	4	5	2	1	1	1	1	1	1	1	6	3	1	2	gut, dass die Diagnose immer auf Deutsch auch noch beschrieben werden.	2	1	2	1	2
4	2	70	1	27	2	1	2	1	5	5	1	1	1	1	1	3	1	1	1	3	2	1	Für mich waren nicht alle verwendeten Begriffe verständlich ungeklärt: z.B.: postöthylisch Child B 7 Punkt -K.92.1. Dafür das diese Formulierungen unter "Hauptdiagnose" verwendet wird, wäre mir die Erklärung (Zustand nach Blutung im Oberen Verdauungstrakt) möglicherweise zu dürftig. Ansonsten find ich den Entlassungsbrief sehr parientenfreundlich gestaltet - da v.o. die weiteren Vorgehensweisen k…	2	1	1	1	2
4	2	71	2	24	1	2	1	1	2	1	1	2	1	2	1	1	1	1	1	4	2	1	+: sehr übersichtlich vor allem die Markierungen von für Patienten relevante weitere Termine und Medikationsliste sind sehr gut. -: Für medizinische Laien nur mittels "googlen" verständlich	2	1	1	1	2
4	2	72	2	25	1	2	3	1	1	2	1	2	1	2	3	2	1	1	1	5	2	5		2	2	2	1	5
4	2	73	1	25	1	1	1	1	1	1	1	2	1	1	3	1	1	1	1	2	1	1		2	1	1	1	1
4	2	74	2		1	2	5	2	2	3	1	2	1	1	3	2	1	1	1	2	1	2		2	2	2	1	2
